# Supplementary material for: Epidemiology of non-steroidal anti-inflammatory drugs consumption in Spain. The MCC-Spain study
Source: PubMed Central journal article supplement (PMC6150967; doi:10.1186/s12889-018-6019-z), 2018-09-21
Supplement: 12889_2018_6019_MOESM1_ESM.pdf [file 12889_2018_6019_MOESM1_ESM.pdf]

Additional file 1. NSAID-group ever use by age and sex [% , (95% CI)]

|                 |              | <b>Non-aspirin NSAIDs (M01a)</b> | <b>Aspirin (N02ba01)</b> | <b>Butylpyrazolidines (M01aa)</b> | <b>Acetate derivates (M01ab)</b> | <b>Oxicam (M01ac)</b> | <b>Propionates (M01ae)</b> | <b>Coxib (M01ah)</b> | <b>Others (M01ax)</b> |
|-----------------|--------------|----------------------------------|--------------------------|-----------------------------------|----------------------------------|-----------------------|----------------------------|----------------------|-----------------------|
| <b>All ages</b> | <b>ALL</b>   | 29.6 (28.2-31.1)                 | 11.2 (10.2-12.2)         | 0.03 (0.00-0.15)                  | 7.6 (6.8-8.5)                    | 0.6 (0.4-0.9)         | 20.9 (19.6-22.3)           | 0.6 (0.4-1.0)        | 2.2 (1.8-2.7)         |
|                 | <b>Men</b>   | 22.3 (20.5-24.2)                 | 11.7 (10.3-13.2)         | 0.1 (0.0-0.4)                     | 7.3 (6.2-8.5)                    | 0.4 (0.2-0.8)         | 14.8 (13.3-16.4)           | 0.3 (0.1-0.7)        | 1.7 (1.2-2.4)         |
|                 | <b>Women</b> | 38.8 (36.7-41.0)                 | 5.2 (4.3-6.3)            | 0                                 | 8.5 (7.3-9.8)                    | 0.8 (0.5-1.3)         | 29.2 (27.3-31.3)           | 1.0 (0.6-1.5)        | 2.5 (1.8-3.2)         |
| <b>&lt;45</b>   | <b>All</b>   | 44.2 (39.4-49.1)                 | 1.7 (0.7-3.4)            | 0                                 | 4.8 (2.9-7.2)                    | 0.5 (0.1-1.7)         | 39.7 (35.0-44.5)           | 0.2 (0.0-1.3)        | 0.7 (0.1-2.1)         |
|                 | <b>Men</b>   | 37.5 (25.7-50.5)                 | 1.6 (0.1-8.4)            | 0                                 | 6.3 (1.7-15.2)                   | 0                     | 34.4 (22.9-47.3)           | 0                    | 0                     |
|                 | <b>Women</b> | 45.4 (40.1-50.7)                 | 1.7 (0.6-3.6)            | 0                                 | 4.5 (2.6-7.2)                    | 0.6 (0.1-2.0)         | 40.6 (35.5-45.9)           | 0.3 (0.0-1.6)        | 0.8 (0.2-2.4)         |
| <b>45-54</b>    | <b>All</b>   | 40.8 (36.7-44.9)                 | 3.1 (1.9-4.9)            | 0                                 | 8.1 (6.0-10.6)                   | 0.7 (0.2-1.8)         | 33.5 (29.7-37.5)           | 0.9 (0.3-2.0)        | 1.7 (0.8-3.2)         |
|                 | <b>Men</b>   | 33.8 (26.3-41.9)                 | 5.3 (2.3-10.2)           | 0                                 | 9.9 (5.7-15.9)                   | 0.7 (0.0-3.6)         | 27.2 (20.2-35.0)           | 0                    | 0.7 (0.0-3.6)         |
|                 | <b>Women</b> | 43.2 (38.4-48.1)                 | 2.3 (1.1-4.3)            | 0                                 | 7.5 (5.2-10.4)                   | 0.7 (0.1-2.0)         | 35.7 (31.2-40.5)           | 1.2 (0.4-2.7)        | 2.1 (1.0-4.0)         |
| <b>55-64</b>    | <b>All</b>   | 30.1 (27.3-33.0)                 | 7.6 (6.0-9.4)            | 0                                 | 8.9 (7.2-10.8)                   | 0.6 (0.2-1.3)         | 20.9 (18.5-23.6)           | 1.0 (0.5-1.8)        | 2.4 (1.5-3.5)         |
|                 | <b>Men</b>   | 23.6 (20.1-27.3)                 | 9.1 (6.9-11.8)           | 0                                 | 7.7 (5.7-10.2)                   | 0.5 (0.1-1.5)         | 15.3 (12.4-18.5)           | 0.7 (0.2-1.8)        | 2.1 (1.1-3.7)         |
|                 | <b>Women</b> | 38.5 (34.0-43.2)                 | 5.6 (3.7-8.2)            | 0                                 | 10.4 (7.7-13.6)                  | 0.7 (0.1-2.0)         | 28.2 (24.0-32.6)           | 1.4 (0.5-2.9)        | 2.7 (1.4-4.7)         |
| <b>65-74</b>    | <b>All</b>   | 27.4 (24.9-30.0)                 | 11.4 (9.7-13.3)          | 0.2 (0.0-0.6)                     | 8.2 (6.8-9.9)                    | 0.6 (0.3-1.2)         | 17.7 (15.6-19.9)           | 0.5 (0.2-1.1)        | 2.7 (1.9-3.8)         |
|                 | <b>Men</b>   | 22.7 (19.8-25.7)                 | 14.1 (11.8-16.7)         | 0                                 | 7.5 (5.9-9.5)                    | 0.4 (0.1-1.1)         | 14.6 (12.2-17.2)           | 0.4 (0.1-1.1)        | 1.9 (1.0-3.1)         |

|     |              |                  |                  |   |                 |               |                  |               |               |
|-----|--------------|------------------|------------------|---|-----------------|---------------|------------------|---------------|---------------|
|     | <b>Women</b> | 35.3 (31.0-39.8) | 6.9 (4.8-9.6)    | 0 | 9.5 (7.0-12.4)  | 1.1 (0.3-2.4) | 22.9 (19.2-26.9) | 0.8 (0.2-2.1) | 4.2 (2.6-6.4) |
| ≥75 | <b>All</b>   | 21.1 (18.3-24.2) | 12.4 (10.1-14.9) | 0 | 7.5 (5.7-9.6)   | 0.5 (0.1-1.3) | 12.3 (10.1-14.9) | 0.5 (0.1-1.3) | 1.7 (0.9-2.9) |
|     | <b>Men</b>   | 14.2 (11.1-17.7) | 14.2 (11.1-17.7) | 0 | 5.5 (3.6-8.1)   | 0.2 (0.0-1.2) | 7.7 (5.5-10.6)   | 0             | 1.5 (0.6-3.2) |
|     | <b>Women</b> | 31.1 (26.1-36.5) | 9.8 (6.7-13.6)   | 0 | 10.4 (7.3-14.3) | 0.9 (0.2-2.7) | 18.9 (14.7-23.6) | 1.3 (0.3-3.2) | 1.9 (0.7-4.1) |
