# Supplementary material for: Epidemiology of non-steroidal anti-inflammatory drugs consumption in Spain. The MCC-Spain study
Source: PubMed Central journal article supplement (PMC6150967; doi:10.1186/s12889-018-6019-z), 2018-09-21
Supplement: 12889_2018_6019_MOESM2_ESM.pdf [file 12889_2018_6019_MOESM2_ESM.pdf]

Additional file 2. NSAID-group current use by age and sex [% , (95% CI)]

|                 |              | <b>Non-aspirin NSAIDs (M01a)</b> | <b>Aspirin (N02ba01)</b> | <b>Butylpyrazolidines (M01aa)</b> | <b>Acetate derivatives (M01ab)</b> | <b>Oxicam (M01ac)</b> | <b>Propionates (M01ae)</b> | <b>Coxib (M01ah)</b> | <b>Others (M01ax)</b> |
|-----------------|--------------|----------------------------------|--------------------------|-----------------------------------|------------------------------------|-----------------------|----------------------------|----------------------|-----------------------|
| <b>All ages</b> | <b>ALL</b>   | 14.8 (13.7-15.9)                 | 5.9 (5.2-6.7)            | 0                                 | 2.7 (2.2-3.3)                      | 0.2 (0.1-0.5)         | 10.3 (9.4-11.3)            | 0.5 (0.3-0.7)        | 1.6 (1.2-2.0)         |
|                 | <b>Men</b>   | 9.0 (7.8-10.3)                   | 9.0 (7.8-10.3)           | 0                                 | 2.3 (1.7-3.1)                      | 0.1 (0.0-0.4)         | 5.6 (4.7-6.7)              | 0.3 (0.1-0.6)        | 1.3 (0.9-1.9)         |
|                 | <b>Women</b> | 20.7 (19.0-22.5)                 | 2.9 (2.2-3.7)            | 0                                 | 3.1 (2.4-4.0)                      | 0.3 (0.1-0.7)         | 15.0 (13.4-16.6)           | 0.6 (0.3-1.1)        | 1.9 (1.3-2.6)         |
| <b>&lt;45</b>   | <b>All</b>   | 22.1 (18.2-26.4)                 | 0.2 (0.0-1.3)            | 0                                 | 1.7 (0.7-3.4)                      | 0.2 (0.0-1.3)         | 19.0 (15.4-23.1)           | 0.2 (0.0-1.3)        | 0.7 (0.1-2.1)         |
|                 | <b>Men</b>   | 10.9 (4.5-21.2)                  | 0.0 (0.0-0.6)            | 0                                 | 3.1 (0.4-10.8)                     | 0                     | 9.4 (3.5-19.3)             | 0                    | 0                     |
|                 | <b>Women</b> | 24.1 (19.7-28.9)                 | 0.3 (0.0-1.6)            | 0                                 | 1.4 (0.5-3.2)                      | 0.3 (0.0-1.6)         | 20.7 (16.6-25.3)           | 0.3 (0.0-1.6)        | 0.8 (0.2-2.4)         |
| <b>45-54</b>    | <b>All</b>   | 21.4 (18.1-25.0)                 | 1.0 (0.4-2.2)            | 0                                 | 2.6 (1.5-4.2)                      | 0.2 (0.0-1.0)         | 17.1 (14.1-20.4)           | 0.3 (0.0-1.2)        | 1.4 (0.6-2.7)         |
|                 | <b>Men</b>   | 9.3 (5.2-15.1)                   | 2.6 (0.7-6.6)            | 0                                 | 2.0 (0.4-5.7)                      | 0                     | 7.9 (4.2-13.5)             | 0                    | 0.7 (0.0-3.6)         |

|              |              |                  |                 |   |               |               |                  |               |               |
|--------------|--------------|------------------|-----------------|---|---------------|---------------|------------------|---------------|---------------|
|              | <b>Women</b> | 25.7 (21.6-30.1) | 0.5 (0.1-1.7)   | 0 | 2.8 (1.5-4.8) | 0.2 (0.0-1.3) | 20.3 (16.6-24.5) | 0.5 (0.1-1.7) | 1.6 (0.7-3.3) |
| <b>55-64</b> | <b>All</b>   | 15.0 (12.9-17.4) | 5.2 (3.9-6.8)   | 0 | 2.9 (1.9-4.1) | 0.3 (0.1-0.9) | 10.5 (8.6-12.5)  | 0.7 (0.3-1.4) | 1.7 (1.0-2.7) |
|              | <b>Men</b>   | 11.6 (9.1-14.5)  | 7.0 (5.1-9.4)   | 0 | 2.6 (1.5-4.3) | 0.2 (0.0-1.0) | 7.2 (5.2-9.6)    | 0.5 (0.1-1.5) | 1.8 (0.8-3.2) |
|              | <b>Women</b> | 19.4 (15.8-23.4) | 2.9 (1.6-5.0)   | 0 | 3.2 (1.7-5.2) | 0.5 (0.1-1.6) | 14.6 (11.5-18.3) | 0.9 (0.2-2.3) | 1.6 (0.6-3.2) |
| <b>65-74</b> | <b>All</b>   | 12.0 (10.2-13.9) | 8.5 (7.0-10.2)  | 0 | 2.7 (1.9-3.8) | 0.2 (0.0-0.7) | 7.1 (5.8-8.7)    | 0.4 (0.1-0.9) | 2.1 (1.4-3.1) |
|              | <b>Men</b>   | 9.1 (7.2-11.3)   | 11.0 (8.9-13.3) | 0 | 2.2 (1.3-3.5) | 0.2 (0.0-0.9) | 5.5 (4.0-7.3)    | 0.4 (0.1-1.1) | 1.4 (0.7-2.4) |
|              | <b>Women</b> | 16.8 (13.6-20.5) | 4.4 (2.8-6.7)   | 0 | 3.6 (2.1-5.7) | 0.2 (0.0-1.2) | 9.9 (7.3-12.9)   | 0.4 (0.1-1.5) | 3.4 (1.9-5.4) |
| <b>≥75</b>   | <b>All</b>   | 10.4 (8.3-12.8)  | 9.4 (7.4-11.6)  | 0 | 3.1 (2.1-4.6) | 0.3 (0.0-0.9) | 5.5 (4.0-7.3)    | 0.5 (0.1-1.3) | 1.3 (0.6-2.4) |
|              | <b>Men</b>   | 5.1 (3.3-7.5)    | 11.3 (8.5-14.6) | 0 | 2.0 (0.9-3.7) | 0             | 2.7 (1.4-4.6)    | 0             | 1.1 (0.4-2.6) |
|              | <b>Women</b> | 18.9 (13.9-22.6) | 6.6 (4.1-9.9)   | 0 | 4.7 (2.7-7.7) | 0.6 (0.1-2.3) | 9.4 (6.5-13.2)   | 1.3 (0.3-3.2) | 1.6 (0.5-3.6) |
