# Supplementary material for: Epidemiology of non-steroidal anti-inflammatory drugs consumption in Spain. The MCC-Spain study
Source: PubMed Central journal article supplement (PMC6150967; doi:10.1186/s12889-018-6019-z), 2018-09-21
Supplement: 12889_2018_6019_MOESM3_ESM.pdf [file 12889_2018_6019_MOESM3_ESM.pdf]

Additional file 3. NSAID ever group use by province of recruitment [% , (95% CI)]

| <b>PROVINCE</b>  | <b>Non-aspirin NSAIDs (M01a)</b> | <b>Aspirin (N02ba01)</b> | <b>Butylpyrazolidines (M01aa)</b> | <b>Acetate derivatives (M01ab)</b> | <b>Oxicam (M01ac)</b> | <b>Propionates (M01ae)</b> | <b>Coxib (M01ah)</b> | <b>Others (M01ax)</b> |
|------------------|----------------------------------|--------------------------|-----------------------------------|------------------------------------|-----------------------|----------------------------|----------------------|-----------------------|
| <b>Asturias</b>  | 32.3 (26.4-38.8)                 | 6.9 (4.0-11.0)           | 0                                 | 4.7 (2.4-8.3)                      | 0                     | 22.8 (17.6-28.8)           | 1.3 (0.3-3.7)        | 2.6 (1.0-5.5)         |
| <b>Barcelona</b> | 43.1 (40.0-46.2)                 | 11.7 (9.8-13.9)          | 0.2 (0.0-0.7)                     | 15.8 (13.6-18.2)                   | 0.5 (0.2-1.2)         | 33.1 (30.2-36.1)           | 0.5 (0.2-1.2)        | 3.2 (2.2-4.5)         |
| <b>Cantabria</b> | 26.7 (22.3-31.5)                 | 6.3 (4.1-9.3)            | 0                                 | 3.7 (2.0-6.1)                      | 1.1 (0.3-2.7)         | 18.8 (15.0-23.1)           | 1.3 (0.4-3.1)        | 1.9 (0.7-3.8)         |
| <b>Girona</b>    | 45.1 (34.1-56.5)                 | 6.1 (2.0-13.7)           | 0                                 | 8.5 (3.5-16.8)                     | 1.2 (0.0-6.6)         | 37.8 (27.3-49.2)           | 2.4 (0.3-8.5)        | 1.2 (0.0-6.6)         |
| <b>Granada</b>   | 13.4 (8.8-19.1)                  | 2.7 (0.9-6.1)            | 0                                 | 2.7 (0.9-6.1)                      | 0                     | 11.2 (7.1-16.7)            | 0                    | 1.1 (0.1-3.8)         |
| <b>Gipuzkoa</b>  | 23.5 (19.2-28.2)                 | 3.3 (1.7-5.7)            | 0                                 | 7.7 (5.2-11.0)                     | 0.8 (0.2-2.4)         | 13.3 (9.9-17.2)            | 1.1 (0.3-2.8)        | 2.5 (1.1-4.7)         |

|                 |                  |                 |   |                 |                |                  |               |                 |
|-----------------|------------------|-----------------|---|-----------------|----------------|------------------|---------------|-----------------|
| <b>Huelva</b>   | 33.1 (26.3-40.6) | 14.0 (9.3-20.0) | 0 | 9.0 (5.2-14.2)  | 0.6 (0.0-3.1)  | 27.0 (20.6-34.1) | 0.6 (0.0-3.1) | 0.6 (0.0-3.1)   |
| <b>León</b>     | 31.7 (27.4-36.3) | 6.8 (4.6-9.6)   | 0 | 4.3 (2.6-6.6)   | 0.2 (0.0-1.3)  | 23.4 (19.5-27.6) | 0.2 (0.0-1.3) | 1.6 (0.6-3.2)   |
| <b>Madrid</b>   | 22.0 (19.0-25.1) | 8.7 (6.8-11.0)  | 0 | 2.9 (1.8-4.3)   | 0.5 (0.01-1.4) | 14.9 (12.4-17.7) | 0             | 1.9 (1.0-3.2)   |
| <b>Murcia</b>   | 16.7 (7.0-31.4)  | 9.5 (2.7-22.6)  | 0 | 7.1 (1.5-19.5)  | 2.4 (0.1-12.6) | 9.5 (2.7-22.6)   | 0             | 0               |
| <b>Navarra</b>  | 29.6 (24.2-35.3) | 10.6 (7.2-14.8) | 0 | 12.8 (9.1-17.3) | 1.5 (0.4-3.7)  | 16.4 (12.2-21.4) | 1.5 (0.4-3.7) | 0.4 (0.01-2.02) |
| <b>Valencia</b> | 25.2 (18.5-32.8) | 7.7 (4.1-13.1)  | 0 | 1.9 (0.4-5.6)   | 0              | 3.2 (1.4-27.2)   | 0.9 (0.2-4.6) | 3.2 (1.1-7.4)   |
