# Supplementary material for: Epidemiology of non-steroidal anti-inflammatory drugs consumption in Spain. The MCC-Spain study
Source: PubMed Central journal article supplement (PMC6150967; doi:10.1186/s12889-018-6019-z), 2018-09-21
Supplement: 12889_2018_6019_MOESM4_ESM.pdf [file 12889_2018_6019_MOESM4_ESM.pdf]

Additional file 4. Consumption of specific non-aspirin NSAIDs. Only active principles with reported anytime-consumption over 1% are included. Data indicate percentage and 95% confidence interval

| <b>NSAID group</b>       | <b>NSAID specific drug</b>  | <b>Anytime consumption</b> | <b>Current consumption</b> |
|--------------------------|-----------------------------|----------------------------|----------------------------|
| <b>Acetate derivates</b> | <b>Diclofenac</b>           | 6.4 (5.6-7.2)              | 2.0 (1.6-2.4)              |
|                          | <b>Aciclofenac</b>          | 1.5 (1.1-1.9)              | 0.6 (0.4-0.9)              |
| <b>Propionates</b>       | <b>Ibuprofen</b>            | 20.4 (19.2-21.7)           | 9.2 (8.4-10.2)             |
|                          | <b>Naproxen</b>             | 1.4 (1.0-1.8)              | 0.7 (0.5-1.0)              |
| <b>Others</b>            | <b>Chondroitin sulphate</b> | 1.3 (0.9-1.6)              | 1.0 (0.7-1.3)              |
